# Supplementary material for: Allogeneic Stem Cell Transplantation in Multiple Myeloma: Risk Factors and Outcomes in the Era of New Therapeutic Options—A Single-Center Experience
Source: MDPI journal article supplement (doi:10.3390/cancers15245738), 2023-12-07
Supplement: s1 [file s1]

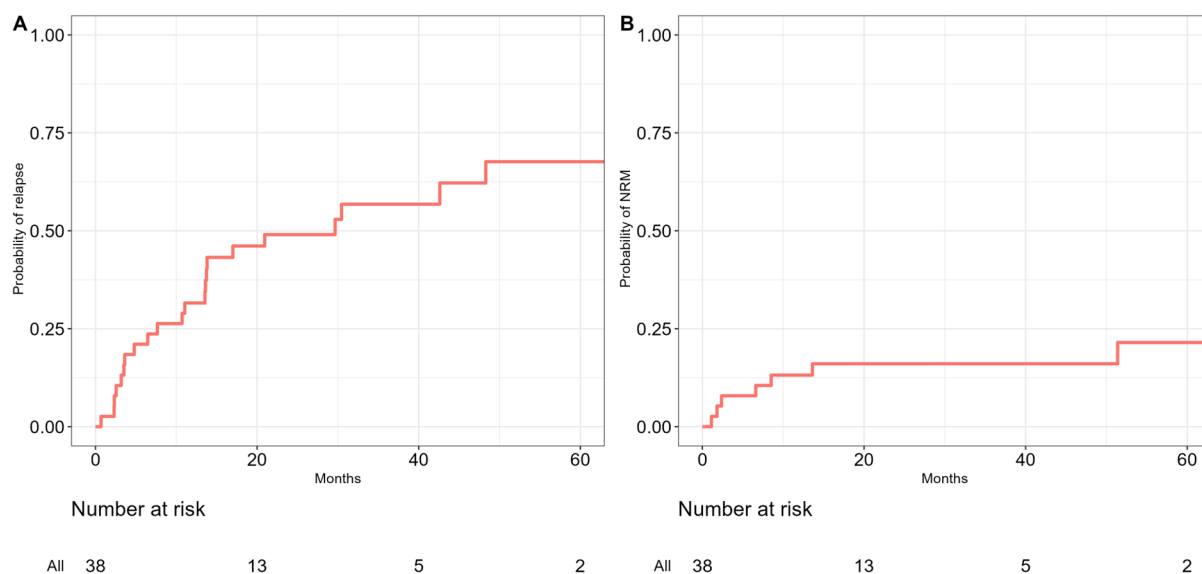

**Supplementary Figure S1. Cumulative Incidence for Relapse and Non-relapse mortality, overall cohort**  
 (A) Cumulative incidence for relapse. (B) Cumulative incidence for non-relapse mortality.

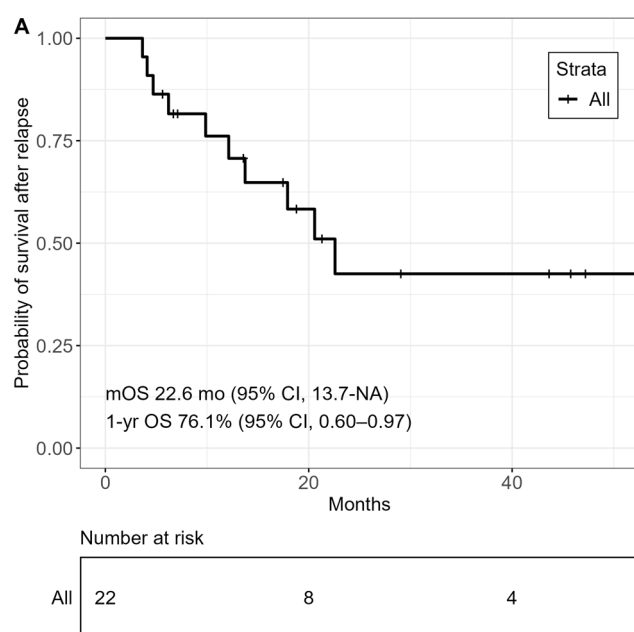

**Supplementary Figure S2. Kaplan-Meier curve of overall survival from first relapse after allo-HSCT.**

**Supplementary Table S1.** Number of therapy regimens and best response after relapse post allo-HSCT.

|                                                         | 2013-2018<br>(n=12) | 2019-2022<br>(n=10) | All patients<br>(n=22) |
|---------------------------------------------------------|---------------------|---------------------|------------------------|
| Median therapy regimens after relapse post<br>allo-HSCT | 6 (0-9)             | 4 (2-4)             | 4 (0-9)                |
| Best response to subsequent treatment                   |                     |                     |                        |
| SCR                                                     | 3 (25%)             | 3 (30%)             | 6 (27%)                |
| CR                                                      | 2 (17%)             | 1 (10%)             | 3 (14%)                |
| VGPR                                                    | 1 (8%)              | 1 (10%)             | 2 (9%)                 |
| PR                                                      | 1 (8%)              | 1 (10%)             | 2 (9%)                 |
| < PR                                                    | 4 (33%)             | 4 (40%)             | 8 (36%)                |
| No subsequent treatment lines applied                   | 1 (8%)              | 0 (0%)              | 1 (5%)                 |

Allo-HSCT=allogeneic stem cell transplantation, CR=complete remission, LOT=line of therapy, PR=partial remission, SCR=stringent complete remission, VGPR=very good partial remission.

**Supplementary Table S2.** Therapies administered for relapse after allo-HSCT.

|                             | Relapsed patients (n=22) |
|-----------------------------|--------------------------|
| <b>Proteasome inhibitor</b> | 17 (77%)                 |
| Bortezomib                  | 3 (14%)                  |
| Carfilzomib                 | 17 (77%)                 |
| Ixazomib                    | 9 (41%)                  |
| <b>IMiD</b>                 | 18 (82%)                 |
| Lenalidomide                | 8 (36%)                  |
| Pomalidomide                | 15 (68%)                 |
| <b>Monoclonal antibody</b>  | 17 (77%)                 |
| Daratumumab                 | 11 (50%)                 |
| Isatuximab                  | 4 (18%)                  |
| Elotuzumab                  | 9 (41%)                  |
| <b>Chemotherapy</b>         | 9 (41%)                  |
| D-PACE                      | 6 (27%)                  |
| DCEP                        | 2 (9%)                   |
| Bendamustine                | 2 (9%)                   |
| Cyclophosphamide            | 1 (5%)                   |
| Venetoclax                  | 5 (23%)                  |
| Selinexor                   | 1 (5%)                   |
| Interferon                  | 2 (9%)                   |
| Belantamab mafodotin        | 5 (23%)                  |
| Teclistamab                 | 7 (32%)                  |
| Talquetamab                 | 1 (5%)                   |
| Radiation therapy           | 5 (23%)                  |
| 2 <sup>nd</sup> allo-HSCT   | 1 (5%)                   |

Allo-HSCT=allogeneic stem cell transplantation, IMiD=immunomodulatory drug, D-PACE=dexamethasone/ cisplatin/ doxorubicin/ cyclophosphamide/ etoposide, DCEP=dexamethasone/ cyclophosphamide/ etoposide/ cisplatin.
